# Supplementary material for: Translation, cultural adaptation, validity and reliability of the Greek version of the modified Constant Score
Source: PubMed Central journal article supplement — JSES Open Access. 2017 Apr 19;1(1):45–50. doi: 10.1016/j.jses.2017.02.004 (PMC6340836; doi:10.1016/j.jses.2017.02.004), 2017-04-19
Supplement: mmc2.pdf [file mmc2.pdf]

# Constant Score - Greek Version

Πανεπιστημιακό Νοσοκομείο Πατρών - Ορθοπαιδική Κλινική

|                        |                       |        |            |             |      |
|------------------------|-----------------------|--------|------------|-------------|------|
| Όνοματεπώνυμο Ασθενούς | Στοιχεία επικοινωνίας | Ηλικία | Φύλο       | Βάρος       | Ύψος |
| Διάγνωση               | Επικρατούν άκρο       |        |            | Πάσχων ώμος |      |
|                        | Δ                     | A      | Και τα δύο | Δ           | A    |
| Μορφωτικό επίπεδο      | Παρατηρήσεις          |        |            |             |      |
| Στοιχεία εξεταστή      | Ημερομηνία            |        |            |             |      |

| <b>A. Πόνος (μέγιστο 15 βαθμοί): (μέσος όρος 1+2/2)</b>                                                                                                                                                                                                                                                                                                                                                                                                |   |                   |   |                      |   | <b>A=</b>                                                                                                                   |        |                        |                        |   |    |    |    |    |    |    |
|--------------------------------------------------------------------------------------------------------------------------------------------------------------------------------------------------------------------------------------------------------------------------------------------------------------------------------------------------------------------------------------------------------------------------------------------------------|---|-------------------|---|----------------------|---|-----------------------------------------------------------------------------------------------------------------------------|--------|------------------------|------------------------|---|----|----|----|----|----|----|
| <p>1. Έχετε πόνο στον ώμο σας κατά τις καθημερινές σας δραστηριότητες;<br/>Όχι=15 Ήπιο=10 Μέτριο=5 Σοβαρό Μόνιμο=0</p>                                                                                                                                                                                                                                                                                                                                 |   |                   |   |                      |   | 1 <input type="text"/>                                                                                                      |        |                        |                        |   |    |    |    |    |    |    |
| <p>2. Εάν "0" σημαίνει καθόλου πόνος και "15" είναι ο μέγιστος πόνος που νοιώθετε, παρακαλώ κυκλώστε το επίπεδο πόνου του δικού σας πάσχοντος ώμου. (15- επίπεδο πόνου)</p>                                                                                                                                                                                                                                                                            |   |                   |   |                      |   | 2 <input type="text"/>                                                                                                      |        |                        |                        |   |    |    |    |    |    |    |
| Επίπεδο του πόνου                                                                                                                                                                                                                                                                                                                                                                                                                                      | 0 | 1                 | 2 | 3                    | 4 | 5                                                                                                                           | 6      | 7                      | 8                      | 9 | 10 | 11 | 12 | 13 | 14 | 15 |
| <b>B. Δραστηριότητες της καθημερινής ζωής (μέγιστο 20 βαθμοί): Σύνολο (1+2+3+4)</b>                                                                                                                                                                                                                                                                                                                                                                    |   |                   |   |                      |   | <b>B=</b>                                                                                                                   |        |                        |                        |   |    |    |    |    |    |    |
| <p>1. Περιορίζεται η καθημερινή σας ζωή ή η εργασία σας από το πρόβλημα του ώμου;<br/>Όχι=4 Μικρός περιορισμός=2 Σοβαρός περιορισμός=0</p>                                                                                                                                                                                                                                                                                                             |   |                   |   |                      |   | 1 <input type="text"/>                                                                                                      |        |                        |                        |   |    |    |    |    |    |    |
| <p>2. Περιορίζονται οι ψυχαγωγικές σας ασχολίες και οι συνήθειές σας από το πρόβλημα του ώμου σας;<br/>Όχι=4 Μικρός περιορισμός=2 Σοβαρός περιορισμός=0</p>                                                                                                                                                                                                                                                                                            |   |                   |   |                      |   | 2 <input type="text"/>                                                                                                      |        |                        |                        |   |    |    |    |    |    |    |
| <p>3. Επιρεάζεται ο νυχτερινός ύπνος σας από το πρόβλημα του ώμου σας;<br/>Όχι=2 Λίγο=1 Πολύ=0</p>                                                                                                                                                                                                                                                                                                                                                     |   |                   |   |                      |   | 3 <input type="text"/>                                                                                                      |        |                        |                        |   |    |    |    |    |    |    |
| <p>4. Πείτε μας σε ποιο ύψος μπορείτε να χρησιμοποιήσετε το χέρι σας για την εργασία και τις καθημερινές σας δραστηριότητες.<br/>Μέση=2 Στέρνο/Στήθος=4 Λαιμός=6 Κεφάλι=8 Πάνω από το κεφάλι=10</p>                                                                                                                                                                                                                                                    |   |                   |   |                      |   | 4 <input type="text"/>                                                                                                      |        |                        |                        |   |    |    |    |    |    |    |
| <b>Γ. Εύρος κίνησης [να συμπληρωθεί από τον ιατρό]/ (μέγιστο 40 βαθμοί): Σύνολο (1+2+3+4)</b>                                                                                                                                                                                                                                                                                                                                                          |   |                   |   |                      |   | <b>Γ=</b>                                                                                                                   |        |                        |                        |   |    |    |    |    |    |    |
| <b>1. Κάμψη</b>                                                                                                                                                                                                                                                                                                                                                                                                                                        |   | <b>2. Απαγωγή</b> |   | <b>3. Έξω στροφή</b> |   | <b>4. Έσω στροφή</b>                                                                                                        |        | 1 <input type="text"/> |                        |   |    |    |    |    |    |    |
| 0                                                                                                                                                                                                                                                                                                                                                                                                                                                      |   | 0-30°             |   | 0                    |   | Η ράχη του χεριού:<br>Στο μηρό                                                                                              |        |                        | 2 <input type="text"/> |   |    |    |    |    |    |    |
| 2                                                                                                                                                                                                                                                                                                                                                                                                                                                      |   | 31-60°            |   | 2                    |   | Στους γλουτούς                                                                                                              |        | 3 <input type="text"/> |                        |   |    |    |    |    |    |    |
| 4                                                                                                                                                                                                                                                                                                                                                                                                                                                      |   | 61-90°            |   | 4                    |   | Ιερολαγώνιες                                                                                                                |        |                        | 4 <input type="text"/> |   |    |    |    |    |    |    |
| 6                                                                                                                                                                                                                                                                                                                                                                                                                                                      |   | 91-120°           |   | 6                    |   | Στη μέση                                                                                                                    |        | 4 <input type="text"/> |                        |   |    |    |    |    |    |    |
| 8                                                                                                                                                                                                                                                                                                                                                                                                                                                      |   | 121-150°          |   | 8                    |   | Στον Θ12                                                                                                                    |        |                        | 4 <input type="text"/> |   |    |    |    |    |    |    |
| 10                                                                                                                                                                                                                                                                                                                                                                                                                                                     |   | >150°             |   | 10                   |   | Στον Θ7                                                                                                                     |        | 4 <input type="text"/> |                        |   |    |    |    |    |    |    |
| 10                                                                                                                                                                                                                                                                                                                                                                                                                                                     |   | >150°             |   | 10                   |   | Πλήρης ανύψωση του άκρου                                                                                                    |        |                        | 4 <input type="text"/> |   |    |    |    |    |    |    |
| <b>Δ. Δύναμη απαγωγής (μέγιστο 25 βαθμοί). Βαθμολογείται η καλύτερη από τις 3 διαδοχικές μετρήσεις που πραγματοποιούνται με διάστημα ανάπαυσης τουλάχιστον 1 λεπτού μεταξύ αυτών.</b>                                                                                                                                                                                                                                                                  |   |                   |   |                      |   | <b>Δ=</b>                                                                                                                   |        |                        |                        |   |    |    |    |    |    |    |
| <ul style="list-style-type: none"> <li>• Το άνω άκρο σε 90 μοίρες απαγωγή.</li> <li>• Η παλάμη στραμμένη προς το έδαφος.</li> <li>• Ο μίαντας τοποθετείται στον καρπό (δείτε εικόνα)</li> <li>• Ο ασθενής πρέπει να κρατήσει την τάση για 3 sec.</li> <li>• Η μέτρηση προϋποθέτει την απουσία πόνου.</li> <li>• Εάν υπάρχει πόνος η μέτρηση είναι "0"</li> <li>• Εάν ο ασθενής δεν έχει τουλάχιστον 90° απαγωγή, η μέτρηση είναι επίσης "0"</li> </ul> |   |                   |   |                      |   | <table border="1"> <tr> <th>Βαθμοί</th> </tr> <tr> <td>1 βαθμός/pound</td> </tr> <tr> <td>2,2 βαθμοί/kg</td> </tr> </table> | Βαθμοί | 1 βαθμός/pound         | 2,2 βαθμοί/kg          |   |    |    |    |    |    |    |
| Βαθμοί                                                                                                                                                                                                                                                                                                                                                                                                                                                 |   |                   |   |                      |   |                                                                                                                             |        |                        |                        |   |    |    |    |    |    |    |
| 1 βαθμός/pound                                                                                                                                                                                                                                                                                                                                                                                                                                         |   |                   |   |                      |   |                                                                                                                             |        |                        |                        |   |    |    |    |    |    |    |
| 2,2 βαθμοί/kg                                                                                                                                                                                                                                                                                                                                                                                                                                          |   |                   |   |                      |   |                                                                                                                             |        |                        |                        |   |    |    |    |    |    |    |
|                                                                                                                                                                                                                                                                                                                                                                   |   |                   |   |                      |   | 1η προσπάθεια <input type="text"/>                                                                                          |        |                        |                        |   |    |    |    |    |    |    |
|                                                                                                                                                                                                                                                                                                                                                                                                                                                        |   |                   |   |                      |   | 2η προσπάθεια <input type="text"/>                                                                                          |        |                        |                        |   |    |    |    |    |    |    |
|                                                                                                                                                                                                                                                                                                                                                                                                                                                        |   |                   |   |                      |   | 3η προσπάθεια <input type="text"/>                                                                                          |        |                        |                        |   |    |    |    |    |    |    |
